# Supplementary material for: Comprehensive evaluation of genes related to basement membrane in hepatocellular carcinoma
Source: publisher site journal article supplement (doi:10.18632/aging.205923), 2024-06-12
Supplement: Supplementary file [file aging-v16i11-205923-supplementary-material-SD2.pdf]

**SUPPLEMENTARY TABLE**

**Supplementary Table 1. Cox regression analysis of all 66 common genes.**

| <b>Gene</b> | <b>HR</b>   | <b>z</b>     | <b>P-value</b> | <b>Lower</b> | <b>Upper</b> |
|-------------|-------------|--------------|----------------|--------------|--------------|
| CTSA        | 1.208736081 | 1.953452323  | 0.050766021    | 0.999368267  | 1.461966486  |
| MEP1A       | 1.141371898 | 2.39743743   | 0.016510201    | 1.024422359  | 1.271672565  |
| CSPG4       | 1.012235234 | 0.102779146  | 0.918138257    | 0.802723461  | 1.276429828  |
| ECM1        | 1.14633304  | 2.098923067  | 0.035823683    | 1.009082487  | 1.302251754  |
| NPNT        | 1.007033479 | 0.100735389  | 0.919760518    | 0.878658105  | 1.154164994  |
| SMOC1       | 0.798636763 | -2.523830863 | 0.011608377    | 0.670680112  | 0.951005803  |
| SERPINF1    | 0.911291972 | -1.658511915 | 0.097214185    | 0.81654932   | 1.017027433  |
| LAMC1       | 1.055998131 | 0.793713324  | 0.427362342    | 0.923060811  | 1.20808081   |
| MPZL2       | 1.183457869 | 1.813153702  | 0.069808118    | 0.986454024  | 1.419805174  |
| SEMA3B      | 0.95708511  | -0.6029272   | 0.546557121    | 0.829899768  | 1.103762098  |
| LAMA4       | 1.062529559 | 0.580777097  | 0.561390693    | 0.865859198  | 1.303871422  |
| LAMB2       | 0.914523064 | -0.89420185  | 0.371213903    | 0.751863239  | 1.11237309   |
| ADAMTS9     | 1.15147831  | 1.203592992  | 0.228746929    | 0.9151772    | 1.448792975  |
| MATN2       | 0.895918432 | -1.444349248 | 0.148640759    | 0.771786861  | 1.040014903  |
| COL18A1     | 0.824274663 | -2.053736731 | 0.040001179    | 0.685450377  | 0.991215035  |
| ADAMTS10    | 0.914344947 | -0.853764883 | 0.393235276    | 0.744443173  | 1.123022836  |
| GPC5        | 0.905059229 | -0.773022665 | 0.439508967    | 0.702802825  | 1.165522076  |
| NTN1        | 0.879202179 | -1.181412318 | 0.237438967    | 0.710120348  | 1.088542913  |
| CTSD        | 1.105473087 | 1.028377246  | 0.303772407    | 0.913167749  | 1.338276288  |
| NTN4        | 1.033783681 | 0.374077212  | 0.708346872    | 0.868612205  | 1.230363438  |
| LOXL2       | 1.040852407 | 0.406449874  | 0.68441208     | 0.858096209  | 1.262531779  |
| COL9A3      | 1.027544405 | 0.273398916  | 0.784546586    | 0.84567506   | 1.248526243  |
| LAMB3       | 1.030025767 | 0.465960975  | 0.641243434    | 0.909505611  | 1.166516257  |
| LAD1        | 1.036862133 | 0.807651529  | 0.419291214    | 0.949664335  | 1.132066397  |
| COL4A5      | 1.076875164 | 0.847288172  | 0.396834518    | 0.907318578  | 1.278117903  |
| LOXL4       | 1.061932196 | 1.250305779  | 0.211187868    | 0.966468678  | 1.166825179  |
| VTN         | 0.907834236 | -1.998720916 | 0.045638559    | 0.825709732  | 0.998126786  |
| ITGA7       | 0.836451544 | -1.476105543 | 0.139915561    | 0.659869621  | 1.060287007  |
| SPOCK1      | 1.073046995 | 0.665152555  | 0.505952923    | 0.871758887  | 1.320812291  |
| DAG1        | 1.017861896 | 0.152430931  | 0.878847063    | 0.810634681  | 1.278063799  |
| ITGAV       | 1.209718378 | 2.625821436  | 0.008644015    | 1.049462999  | 1.394445115  |
| SDC1        | 1.025940946 | 0.256446377  | 0.797606181    | 0.843561124  | 1.247751698  |
| ADAMTS16    | 1.10684722  | 0.971784005  | 0.331158015    | 0.901920945  | 1.35833498   |
| FBLN1       | 1.072513695 | 1.211194296  | 0.225820948    | 0.957645396  | 1.201160293  |
| SDC4        | 1.022396952 | 0.268471839  | 0.788336149    | 0.869746271  | 1.20183962   |
| ANG         | 0.891216004 | -2.290837663 | 0.021972804    | 0.807588427  | 0.983503403  |
| TINAG       | 1.122051271 | 2.110226018  | 0.034838892    | 1.008233759  | 1.248717417  |
| MEGF9       | 1.060015695 | 0.542360358  | 0.587570283    | 0.858696231  | 1.308534069  |
| SPON2       | 1.074107391 | 1.027796918  | 0.304045366    | 0.937218997  | 1.230989438  |
| ADAM9       | 1.305910556 | 3.447748995  | 0.000565279    | 1.122068525  | 1.519873647  |
| EVA1A       | 0.918881431 | -1.289501607 | 0.197223758    | 0.808008841  | 1.04496763   |
| ADAM10      | 1.018417794 | 0.135188957  | 0.892462478    | 0.781655637  | 1.326894802  |
| ADAMTS17    | 0.951728773 | -0.505998903 | 0.61285742     | 0.785751184  | 1.15276652   |
| P3H1        | 1.511152022 | 3.397823996  | 0.000679241    | 1.190907368  | 1.917513063  |
| ADAMTS13    | 1.209832757 | 1.87216184   | 0.061184217    | 0.991106401  | 1.476829631  |

|        |             |              |             |             |             |
|--------|-------------|--------------|-------------|-------------|-------------|
| MMP17  | 1.067408965 | 0.542758362  | 0.587296185 | 0.843383003 | 1.350942448 |
| ITGA5  | 1.205334624 | 2.114436612  | 0.034477993 | 1.013737267 | 1.433144073 |
| ITGB5  | 1.263085673 | 2.205451578  | 0.027422422 | 1.026338049 | 1.554444385 |
| VWA1   | 1.054276615 | 0.609218937  | 0.54237933  | 0.889417543 | 1.249693341 |
| CD151  | 1.152078406 | 1.842717162  | 0.065370317 | 0.991032904 | 1.339294234 |
| TGFB1  | 0.939343121 | -0.787057822 | 0.431248019 | 0.803803891 | 1.097737283 |
| BCAN   | 1.063229498 | 0.491762915  | 0.622886956 | 0.832727138 | 1.357535879 |
| ROBO3  | 1.347567377 | 1.728408144  | 0.083915076 | 0.96082445  | 1.889978795 |
| COL2A1 | 1.030761316 | 0.543729797  | 0.586627425 | 0.924118199 | 1.149711034 |
| ITGA1  | 0.888351324 | -0.785825061 | 0.431969983 | 0.661222345 | 1.193498798 |
| GPC3   | 0.992137493 | -0.332147775 | 0.739777676 | 0.946984416 | 1.039443509 |
| ITGA2  | 1.168161502 | 1.547026388  | 0.121856883 | 0.959360641 | 1.422407003 |
| CTSB   | 1.377725522 | 3.074126954  | 0.002111196 | 1.123148191 | 1.690006386 |
| ACHE   | 0.939268943 | -0.781950065 | 0.43424392  | 0.802763817 | 1.098985938 |
| ADAM17 | 1.398506601 | 2.582043115  | 0.009821731 | 1.084162164 | 1.803992777 |
| USH2A  | 0.721946612 | -1.907458477 | 0.056461243 | 0.51655351  | 1.009008556 |
| MMP1   | 1.449655656 | 4.648097194  | 3.35E-06    | 1.23955064  | 1.695373673 |
| ROBO1  | 1.091411473 | 1.475357006  | 0.140116588 | 0.97167718  | 1.225899947 |
| COL9A2 | 1.097038218 | 1.039747457  | 0.298457246 | 0.921302386 | 1.306295165 |
| PHF13  | 1.378771189 | 2.223279867  | 0.026196934 | 1.038773513 | 1.83005243  |
| TENM1  | 1.030695222 | 0.214083474  | 0.830481963 | 0.781485423 | 1.359376142 |
